1 In Utero Activation of NK Cells in Congenital CMV Infection

2

3 Anna V Vaaben<sup>1\*</sup>, Justine Levan<sup>1\*</sup>, Catherine B T Nguyen<sup>1</sup>, Perri C Callaway<sup>1,2</sup>, Mary Prahl<sup>3</sup>, Lakshmi

4 Warriar<sup>1</sup>, Felistas Nankya<sup>4</sup>, Kenneth Musinguzi<sup>4</sup>, Abel Kakuru<sup>4</sup>, Mary K Muhindo<sup>4</sup>, Grant Dorsey<sup>1</sup>,

5 Moses R. Kanya<sup>4,5</sup>, Margaret E. Feeney<sup>1,3</sup>.

6

7 1. Department of Medicine, University of California, San Francisco, San Francisco, CA, United States

8 2. Infectious Diseases and Immunity Graduate Group, University of California Berkeley, California,

9 United States

10 3. Department of Pediatrics, University of California, San Francisco, San Francisco, CA, United States

11 4. Infectious Disease Research Collaboration, Kampala, Uganda

12 5. Department of Medicine, Makerere University College of Health Sciences, Kampala, Uganda

13 \* These authors contributed equally.

14

15

16

17

18

19

20

21

22

23 **Corresponding Author:** Margaret Feeney, MD (Margaret.Feeney@ucsf.edu)

24

25

26

27 **Abstract**

28 **Background:** Congenital cytomegalovirus (CMV) infection is the most common infectious cause of birth  
29 defects and neurological damage in newborns. Despite a well-established role for NK cells in control of  
30 CMV infection in older children and adults, it remains unknown whether fetal NK cells can sense and  
31 respond to CMV infection acquired in utero.

32 **Methods:** Here, we investigate the impact of congenital CMV infection on the neonatal NK cell  
33 repertoire by assessing the frequency, phenotype, and functional profile of NK cells in cord blood  
34 samples from newborns with congenital CMV and from uninfected controls enrolled in a birth cohort of  
35 Ugandan mothers and infants.

36 **Results:** We find that neonatal NK cells from congenitally CMV infected newborns show increased  
37 expression of cytotoxic mediators, signs of maturation and activation, and an expansion of mature CD56-  
38 negative NK cells, an NK cell subset associated with chronic viral infections in adults. Activation was  
39 particularly prominent in NK cell subsets expressing the Fc $\gamma$  receptor CD16, indicating a role for  
40 antibody-mediated immunity against CMV in utero.

41 **Conclusion:** These findings demonstrate that NK cells can be activated in utero and suggest that NK cells  
42 may be an important component of the fetal and infant immune response against CMV.

43

44 **Keywords:** NK cells, Congenital CMV, Cytomegalovirus, CD56neg NK cells, NKG2C, Neonatal  
45 immunity, Cord blood, Flow cytometry.

46

47

48

49

50

51

52

## 53 **Introduction**

54 CMV is the most common congenital infection in humans, impacting 1-5% of all newborns[1]. Infection  
55 with CMV in utero can lead to poorly controlled viremia and devastating clinical consequences, including  
56 poor intrauterine growth, neurologic impairment, and hearing loss[2]. In contrast, primary infection with  
57 CMV in early childhood is common and generally asymptomatic, suggesting that the immune effector  
58 mechanisms responsible for control of CMV infection are not fully developed during gestation[3].  
59 Because the fetus and newborn infant lack memory responses to previously encountered pathogens, their  
60 ability to mount defenses against acute viral infections is limited. Innate immune cells, including NK  
61 cells, likely comprise an important first line of defense to protect the infant upon encounter with  
62 pathogens.

63

64 NK cells kill virally infected cells via release of lytic granules containing granzyme B and perforin. This  
65 cytotoxic function can be triggered through direct contact-dependent recognition via activating NK  
66 receptors (NKR) or indirectly via engagement of the low affinity IgG receptor CD16 (*FcγRIIIa*),  
67 enabling antibody-dependent cellular cytotoxicity (ADCC). The crucial role NK cells play in the host  
68 defense against CMV is demonstrated by cases of severe and even fatal CMV infection among children  
69 with genetic defects leading to selective NK cell deficiency[4,5]. However, the fetal NK cell response to  
70 congenital CMV (cCMV) infection has not been characterized.

71

72 Murine models suggest that NK cells may play a particularly important and non-redundant role in  
73 controlling CMV infection during early life. While murine cytomegalovirus (MCMV) infection is fatal in  
74 neonatal mice, infected neonates can be rescued from this lethal infection by adoptive transfer of NK cells  
75 from adult mice[6]. Whether NK cells play an equally essential role during CMV infection of human  
76 infants is unclear, as neonatal mice are profoundly immunodeficient at birth compared to newborn  
77 humans and lack phenotypically mature NK cells. Furthermore, MCMV encodes a ligand (m157) that can  
78 be directly sensed by the activating Ly49h receptor on murine NK cells, whereas no analogous activating

79 ligand-receptor pairing has yet been described for human NK cells and CMV[7,8]. Here, we investigated  
80 the ability of fetal NK cells to sense and respond to CMV infection prenatally. We compared the  
81 frequency and phenotype of NK cell subsets, including their expression of activation markers and  
82 antiviral cytotoxic mediators, in cord blood from Ugandan infants with and without congenital CMV  
83 infection. We found that congenital CMV infection resulted in prenatal expansion, activation, and  
84 maturation of NK cells with robust upregulation of cytotoxic mediators. These findings were particularly  
85 striking in the CD56<sup>dim</sup> and CD56<sup>neg</sup> NK cell subsets which express CD16 at a high frequency. These  
86 findings suggest that NK cells, especially those capable of ADCC, may play an important role in the  
87 immune response to CMV in utero.

88

## 89 **Methods**

### 90 **Study population and sample collection**

91 Cord blood mononuclear cells (CBMCs) were obtained from a subset of infants (n = 85) enrolled in a  
92 clinical trial of prenatal malaria chemoprevention conducted in the Busia District, a highly malaria  
93 endemic area in Eastern Uganda (PROMOTE-BC3: NCT02793622). Clinical and epidemiologic details  
94 of this cohort have been previously published[9]. Approximately two-thirds of infants in the cohort had  
95 histologic evidence of placental malaria at birth (including 68.6% of cCMV+ infants and 66.6% of CMV-  
96 negative controls in this study). Umbilical cord blood was collected at the time of delivery using  
97 umbilical cord blood collection kits (Pall Medical) and an aliquot of whole cord blood was preserved in  
98 RNAlater (ThermoFisher). CBMCs were promptly isolated from the remaining cord blood using density  
99 gradient centrifugation (Ficoll-Histopaque; GE Life Sciences) and cryopreserved in liquid nitrogen.

100

### 101 **Ethical approval**

102 Written informed consent was obtained for all study participants upon enrollment in the study. The study  
103 protocol was approved by Makerere University School of Biomedical Sciences Ethics Committee,

104 Uganda National Council of Science and Technology, and University of California, San Francisco  
105 Research Ethics Committee.

106

### 107 **Identification and evaluation of infants with congenital CMV infection**

108 To identify congenitally CMV infected newborns, DNA was extracted from whole cord blood preserved  
109 in RNAlater using the QIAamp DNA Blood Mini Kit (Qiagen Inc) according to the manufacturer's  
110 instructions. Presence of CMV nucleic acids was determined by qPCR targeting the viral UL123 and  
111 UL55 genes using custom primers and SYBR Green chemistry[10]. Growth parameters were reviewed for  
112 the 16 infants who were found to be CMV+ at birth. Infants were considered symptomatic if they had  
113 severe microcephaly at birth (less than the 3<sup>rd</sup> percentile for head circumference) or were severely small-  
114 for-gestational age (SGA; less than the 3<sup>rd</sup> percentile for birth weight for gestational age). Of the 16  
115 newborns with congenital CMV infection included in this study, 5 were symptomatic at birth (2 with  
116 microcephaly, 2 with SGA, and 1 with both microcephaly and SGA).

117

### 118 **Flow cytometry**

119 CBMCs were thawed, counted, evaluated for viability, and stained for extra- and intracellular targets  
120 using standard protocols with antibodies listed in Supplementary Table 1[11,12]. CBMCs were stained  
121 with LIVE/DEAD Fixable Aqua or Near-IR (ThermoFisher) to exclude dead cells. For intracellular  
122 staining, CBMCs were fixed using the Cytofix/Cytoperm kit (BD) and stained in Perm/Wash buffer (BD)  
123 per manufacturer's instructions. Data was acquired on an LSR II (BD) using FACS DIVA software.  
124 Compensation was performed using single-color stained UltraComp beads (Invitrogen) and a minimum of  
125 500,000 events were recorded from each sample. SPHERO Rainbow Calibration Particles (BD) were  
126 used to normalize instrument settings across batches to ensure validity of MFI comparisons. Flow  
127 cytometry data was analyzed using FlowJo (Tree Star, V10.8). Co-expression analysis was calculated in  
128 FlowJo using Boolean gating and visualized in SPICE (NIAID, V6.1).

129

## 130 **Statistical analysis**

131 Statistical analyses were performed in R. Differences between groups were determined using non-  
132 parametric Wilcoxon rank sum test and p values < 0.05 were considered significant. All boxplots display  
133 median values with 25th/75th percentiles and all data points are shown.

134

## 135 **Results**

### 136 **CMV infection in utero induces expansion of CD56-negative NK cells in cord blood**

137 To evaluate the impact of congenital CMV infection on the newborn NK cell repertoire, we compared the  
138 frequency of NK cell subsets in cord blood samples derived from 16 congenitally CMV infected  
139 (cCMV+) and 69 uninfected (cCMV-) newborns using flow cytometry. NK cells were defined as live  
140 CD3<sup>-</sup>/CD14<sup>-</sup>/CD19<sup>-</sup>/CD7<sup>+</sup> lymphocytes positive for CD56 and/or CD16. CD7 is an early lymphoid  
141 marker whose inclusion aids in separating NK cells, particularly those lacking CD56 expression, from  
142 non-classical myeloid cell populations[13]. We defined three major NK subsets based on relative  
143 expression of CD56 and CD16 (Fig. 1A): CD56<sup>dim</sup>CD16<sup>-/+</sup> cells, which are more mature/cytotoxic and  
144 constitute the majority of peripheral NK cells; CD56<sup>bright</sup>CD16<sup>-/+</sup> cells, which are considered  
145 developmentally less mature and finally CD56<sup>neg</sup>CD16<sup>+</sup> NK cells which are increasingly recognized as an  
146 additional mature NK subset that expands during several chronic viral infections[14]. Overall, we did not  
147 observe any difference in the frequency of total NK cells, the sum of the three combined NK subsets,  
148 between cCMV+ and cCMV- newborns ( $P = 0.31$ , Fig. 1B). However, cCMV+ newborns displayed a  
149 skewed distribution towards more mature/differentiated NK cells, with a significantly higher frequency of  
150 CD56<sup>neg</sup> NK cells ( $P = 0.02$ , Fig. 1C). We further observed that NK cells from cCMV+ infants displayed  
151 a striking downregulation of CD7 as measured by median fluorescence intensity (MFI), although they  
152 remained clearly distinguishable from the CD7-negative population (Supplementary Fig. 1A). This  
153 downregulation was particularly evident among the more mature/differentiated subsets (CD56<sup>neg</sup>  $P <$

154 0.001; CD56<sup>dim</sup>  $P < 0.001$ ) (Fig. 1D). NK cells have been shown to downregulate CD7 upon in vitro  
155 stimulation with IL-2 or IL-12+IL-18[15,16]. Thus, the reduced surface expression of CD7 on cord blood  
156 NK cells may suggest recent activation-induced downregulation. Together, these data indicate that even  
157 during fetal life, human NK cells are activated and differentiate in response to viral infection.

158

### 159 **NK cells in congenitally CMV infected newborns show increased expression of cytotoxic** 160 **mediators**

161 To assess the functional capacity of fetal NK cells in CMV infected newborns, we measured the  
162 expression of cytotoxic mediators granzyme B, perforin, and granulysin in cord blood from cCMV+ and  
163 cCMV- newborns. Overall, in all infants evaluated, a high percentage of cord blood NK cells expressed  
164 granzyme B and perforin, suggesting high functional capacity of newborn NK cells, consistent with  
165 previous findings[17]. Among cCMV+ infants, we observed a significantly higher proportion of  
166 granzyme B expression among all NK subsets (CD56<sup>neg</sup>  $P < 0.001$ ; CD56<sup>dim</sup>  $P = 0.002$ ; CD56<sup>bright</sup>  $P =$   
167  $0.008$ ), higher perforin expression on CD56<sup>neg</sup> ( $P = 0.003$ ) and CD56<sup>bright</sup> ( $P = 0.04$ ) NK cells, and higher  
168 granulysin expression on CD56<sup>bright</sup> NK cells ( $P = 0.01$ ) with a trend toward higher expression on CD56<sup>neg</sup>  
169 cells ( $P = 0.07$ , Fig. 2A) as compared to cCMV- controls. In addition, among cCMV+ infants the MFI of  
170 granzyme B was significantly higher on all NK cell subsets (CD56<sup>neg</sup>  $P = 0.005$ ; CD56<sup>dim</sup>  $P = 0.006$ ;  
171 CD56<sup>bright</sup>  $P = 0.007$ ), as was the staining intensity of perforin on CD56<sup>bright</sup> NK cells ( $P = 0.01$ ) and  
172 granulysin on CD56<sup>dim</sup> ( $P = 0.009$ ) and CD56<sup>bright</sup> ( $P = 0.001$ ) NK cells (Fig. 2B). Co-expression analysis  
173 not only confirmed that the majority of CD56<sup>dim</sup> and CD56<sup>neg</sup> NK cells co-express both granzyme B and  
174 perforin, but also revealed that NK cells from cCMV+ individuals more frequently express at least one  
175 cytotoxic mediator and are also more likely to express more than one cytotoxic mediator (Fig. 2C).  
176 While CD56<sup>neg</sup> NK cells overall had lower cytotoxic granule content than CD56<sup>dim</sup> NK cells, among  
177 cCMV+ infants this difference was diminished, with co-expression of perforin and granzyme B on  
178 CD56<sup>neg</sup> NK cells approaching that of CD56<sup>dim</sup> cells (CD56<sup>neg</sup> mean = 85.3% [95% CI  $\pm$  4.46]; CD56<sup>dim</sup> =

179 94.9% [95% CI  $\pm$  1.81]) implying functional competence of fetal CD56<sup>neg</sup> NK cells (Fig. 2C). Together  
180 these data suggest that neonatal NK cells are fully equipped, at or before birth, with cytotoxic mediators  
181 to enable direct cytolysis and/or ADCC function and contribute to antiviral immunity in utero.

182  
183 We additionally evaluated expression of T-bet and eomesodermin, transcription factors that govern NK  
184 cell maturation, development, and function, as well as the proliferation marker Ki67[18]. Consistent with  
185 previous findings, we found a sizeable proportion of cord blood NK cells expressing T-bet, with higher  
186 expression on the more mature NK subsets and minimal expression of eomesodermin across all NK  
187 subsets (Fig. 2D)[19]. We found no difference in T-bet or eomesodermin expression between cCMV+  
188 and cCMV- samples, nor did we see any difference in the proliferation marker Ki67 aside from a trend  
189 towards less frequent expression among CD56<sup>bright</sup> NK cells ( $P = 0.06$ , Fig. 2D).

190  
191 **NK cells from cCMV+ neonates show altered expression of activating and inhibitory NKRs**

192 NK cell activity is regulated through a complex interplay between germline-encoded activating and  
193 inhibitory receptors[20]. CMV infection is known to dramatically alter the NK cell receptor (NKR)  
194 repertoire in children and adults, leading most notably to an expansion of NK cells expressing the  
195 activating receptor NKG2C, often in combination with the terminal differentiation marker CD57 and the  
196 inhibitory receptor LILRB1[21]. To determine how CMV infection in utero influences the infant NK cell  
197 receptor repertoire, we compared the expression of NKRs on NK cells from cCMV+ newborns and  
198 uninfected controls. Overall, we saw high expression of the inhibitory receptor NKG2A across all NK  
199 subsets, supporting previous findings that NKG2A is more highly expressed on neonatal than adult NK  
200 cells and decreases with NK cell maturation[22,23]. Consistent with findings in CMV infected children  
201 and adults, cCMV+ newborns had decreased expression of NKG2A, particularly on the more mature  
202 subsets (CD56<sup>dim</sup>  $P = 0.04$ , CD56<sup>neg</sup>,  $P = 0.07$ , Fig. 3). They also had a lower frequency of CD56<sup>neg</sup> and  
203 CD56<sup>dim</sup> NK cells expressing the natural cytotoxicity receptor NKp30 (CD56<sup>neg</sup>  $P = 0.009$ ; CD56<sup>dim</sup>  $P =$   
204 0.03, Fig. 3)[21,24]. Notably, cCMV was not associated with higher NK cell expression of the activating



205 receptor NKG2C, nor of the inhibitory receptor LILRB1 or the differentiation marker CD57, which were  
206 expressed at very low levels in nearly all infants (Fig. 3). Six infants, including one with congenital CMV  
207 infection, completely lacked NKG2C on all NK cells, consistent with the known ~10% frequency of  
208 NKG2C (*KLRC2*) gene deletion in African populations[25] (Fig. 3, highlighted in red). The cCMV+  
209 infant lacking NKG2C+ NK cells was asymptomatic at birth and born at full term with normal growth  
210 parameters and an unremarkable NK cell profile with respect to NKR expression, NK subset frequencies,  
211 and expression of cytotoxic mediators. Together, our data indicate that the neonatal NK cell response to  
212 CMV differs somewhat from that described in children and adults, particularly with respect to expansion  
213 of NKG2C+ NK cells, which are a hallmark of the NK response to CMV infection later in life.

214

### 215 **NKG2C expression is elevated in newborns with symptomatic CMV infection**

216 Finally, we examined whether there is a relationship between cord blood NK cell phenotypes and clinical  
217 manifestations of congenital CMV. Among the 16 cCMV+ infants in our cohort, 5 had severe growth  
218 abnormalities at birth that were consistent with symptomatic congenital CMV infection, whereas the other  
219 11 infants were asymptomatic, not severely microcephalic or SGA at birth. We compared NK cell subset  
220 frequencies and expression of cytotoxic mediators and NKRs between symptomatic and asymptomatic  
221 cCMV+ infants. We found no difference in the frequency of total NK cells (Fig. 4A) or in NK cell subsets  
222 (Fig. 4B) nor in expression of cytotoxic markers, proliferation markers or transcription factors (Fig. 4C).  
223 However, infants with symptomatic cCMV had a statistically higher percentage of NK cells expressing  
224 NKG2C ( $P = 0.005$ , Fig. 4D). This could suggest that the higher in utero inflammation associated with  
225 severe CMV disease fosters an expansion of NKG2C+ NK cells.

226

### 227 **Discussion**

228 The fetal immune system is uniquely prone towards tolerance in order to prevent fetal-maternal  
229 alloreactivity, which poses a challenge when viral infection occurs in utero. While NK cells play a critical

230 role in the host defense against CMV in adults, little is known about whether fetal NK cells can expand  
231 and react to viral infection in utero[26]. Because NK cells develop by gestational week 6 and are the  
232 dominant lymphocyte population in the fetal liver and lung, they are poised to play an important role in  
233 the fetal immune response[27,28]. Here, we show that neonatal NK cells mature, differentiate, and  
234 upregulate production of cytotoxic mediators in response to CMV infection in utero. This is, to our  
235 knowledge, the first study to demonstrate in utero expansion and maturation of NK cells in response to a  
236 congenital infection. These findings strongly suggest that NK cells may be an important component of  
237 fetal and neonatal host defense against CMV and other viral pathogens.

238  
239 Fetal and neonatal NK cells were previously thought to be functionally impaired, but it has subsequently  
240 been shown that while they are hyporesponsive towards MHC-devoid cells, they can be readily activated  
241 by cytokine and antibody-mediated stimulation[17,22,27,29]. During gestation, maternal antibodies are  
242 transferred across the placenta to the fetus via an active transport mechanism mediated by FcRn, the  
243 neonatal Fc receptor[30]. We speculate that fetal NK cells are preferentially activated via CD16  
244 engagement by IgG, rather than by cytokines or MHC devoid cells, enabling them to harness the breadth  
245 and specificity of maternal-origin IgG. Indeed, we found NK activation and expansion to be particularly  
246 evident in the more mature NK cell subsets dominated by CD16+ cells: the CD56<sup>neg</sup> subset (100%  
247 CD16+) and the CD56<sup>dim</sup> subset (~90% CD16+). Notably, it has recently been shown that the placenta  
248 selectively transfers maternal antibodies with a glycosylation pattern that enhances binding to both FcRn  
249 and to CD16[31]. This suggests that the placenta may preferentially sieve IgG with an Fc-profile skewed  
250 towards activation of fetal NK cells. The ability of CD16+ NK cells to engage maternally derived anti-  
251 CMV IgG may serve as a critical early immune defense, enabling the infant to, in a sense, “borrow”  
252 immune memory from the mother. Enhanced antibody-mediated NK cell killing could help to explain the  
253 much lower rate of adverse sequelae that is seen in congenitally infected infants born to mothers with pre-  
254 existing anti-CMV antibodies compared to seronegative pregnant women who develop primary CMV  
255 infection during pregnancy[32]. This is supported by the finding of *Semmes et al.* that high-avidity

256 maternal CMV-specific non-neutralizing antibodies correlate with protection against congenital CMV  
257 transmission, suggesting that Fc-mediated immune functions are important factors in protection against  
258 fetal infection[33].

259

260 In this study, we demonstrate that CD56<sup>neg</sup> NK cells, an NK subset associated with chronic viral  
261 infections in adults, expand in the cord blood of CMV infected newborns[14]. CD56<sup>neg</sup> NK cells are less  
262 well studied than their CD56 expressing counterparts, in part due to the absence of a canonical marker to  
263 define the NK lineage. Here, we used CD7 in some of our studies to aid in discerning the CD56<sup>neg</sup> NK  
264 subset[13]. CD56<sup>neg</sup> NK cells have been reported to be functionally impaired with decreased cytolytic,  
265 replicative, and antiviral potential, compared to their CD56-expressing counterparts[34–36]. In contrast to  
266 healthy adult peripheral blood, cord blood contains a sizeable population of CD56<sup>neg</sup> NK cells, even in the  
267 absence of infection. Similarly to adult CD56<sup>neg</sup> NK cells, cord blood CD56<sup>neg</sup> NK cells have been  
268 described as functionally impaired with reduced cytotoxic capacity[29,37,38]. Nonetheless, we observed  
269 that CD56<sup>neg</sup> NK cells from cCMV+ newborns downregulated CD7 and gained cytotoxic mediators at  
270 levels approaching that of the mature CD56<sup>dim</sup> subset. Additionally, more recent studies have shown that  
271 CD56<sup>neg</sup> NK cells in fact display high transcriptional and proteomic resemblance to the more mature and  
272 cytotoxic CD56<sup>dim</sup> NK cells, suggesting their functional competence may be greater than initially  
273 thought[39,40]. Specifically, *Forconi et al.* suggested that CD56<sup>neg</sup> NK cells are not well-adapted for  
274 direct natural cytotoxicity because of their downregulation of cytotoxic and activating receptors, but  
275 rather rely on antibody-dependent mechanisms to kill target cells, as illustrated by their high expression of  
276 both CD16 (*FcRγIIIA/B*) and CD32 (*FcRγIIA/B*)[40].

277

278 The phenotypic maturation of NK cells in cCMV+ infants resembled reports in CMV+ adults in some  
279 ways but diverged in others. In particular, we did not observe elevated frequencies of NKG2C+ cells in  
280 congenitally CMV-infected newborns, nor of the terminal differentiation marker CD57 or the inhibitory  
281 receptor LILRB1, both of which are frequently co-expressed on NKG2C+ NK cells[21,41,42]. We did,

282 however see lower frequencies of NK cells expressing NKG2A, the inhibitory counterpart of NKG2C.  
283 NKG2C/A recognize the non-classical class I MHC molecule HLA-E on target cells[42]. HLA-E is  
284 normally stabilized at the cell surface by a conserved leader peptide derived from classical class I HLA  
285 molecules. However, in CMV infected cells, which downregulate class I HLA, a peptide derived from the  
286 CMV-encoded UL40 protein can stabilize HLA-E, leading to NKG2C-mediated NK cell  
287 activation[16,43]. This expansion of NKG2C+ NK cells appears unique to CMV infection and is not  
288 reported in response to other herpesvirus infections[24,41]. However, NKG2C+ NK cell expansion also  
289 requires co-stimulation in the form of pro-inflammatory cytokines, in particular IL-12[16,44]. IL-12 is  
290 under tight epigenetic control in utero as part of the tolerogenic immune environment maintained  
291 throughout gestation[45], and stimulation of cord blood NK cells with IL-12 has been shown to rapidly  
292 restore the functional capacity of cord blood NK cells to levels approaching that of adult NK cells[29,46]  
293 Thus, it is possible that the restricted cytokine environment in utero hinders the expansion of NKG2C+  
294 NK cells in the fetus.

295 We did, however, observe an increase in NKG2C specifically among symptomatic CMV cases, indicating  
296 that increased inflammation or viral load might be associated with fetal expression of NKG2C. Notably,  
297 *Noyola et al.* assessed NK cells in congenitally CMV-infected children 1 month to 7 years after birth and  
298 found that children with past symptomatic congenital CMV infection had higher NKG2C+ NK cell  
299 frequencies than those with asymptomatic congenital infection, further supporting an association of  
300 NKG2C upregulation with more severe infection[48].

301 Our study cohort was limited in size and ability to comprehensively evaluate congenital CMV  
302 symptomology, particularly hearing loss and neurocognitive disabilities, which can manifest years after  
303 birth. It will be important to determine in larger cohorts whether NK-mediated antiviral function  
304 correlates with clinical outcomes following congenital CMV infection. Future studies should additionally  
305 investigate the functional capacity of NK cells to mediate ADCC through maternal IgG engagement and  
306 to control viral replication.

307

308 **Conclusion**

309 In summary, we have demonstrated that despite the tolerogenic environment in utero, fetal NK cells  
310 expand, differentiate, and functionally mature in response to CMV infection prior to birth. This provides a  
311 critical innate first line of defense against viral infection at a time when the fetus lacks acquired immune  
312 memory. Along with prior studies demonstrating that neonatal NK cells can be potently activated by  
313 antibody-mediated stimulation[31], these findings strongly suggest that NK cells may be an important  
314 component of fetal and neonatal host defense against CMV, and perhaps other viral pathogens. Further,  
315 they suggest that vaccination strategies to optimize maternal titers of anti-CMV antibodies that favor  
316 transplacental transfer and FcR-engagement could be of benefit in protecting the fetus from adverse  
317 outcomes following congenital CMV infection.

318

319 **Funding**

320 This work was supported by NIH 5P01HD059454 (GD, MRK, MEF), R01AI093615 (MEF), and  
321 K24AI113002 (MEF).

322

323 **Acknowledgements**

324 The authors are very grateful to all the study participants and their families and would additionally like to  
325 sincerely thank all the study team members for their efforts and contributions.

326

327 **Conflicts of Interest**

328 None

329

330

331

332

333 **References**

334

- 335 1. Lanzieri TM, Dollard SC, Bialek SR, Grosse SD. Systematic review of the birth prevalence of  
336 congenital cytomegalovirus infection in developing countries. *Int J Infect Dis.* **2014**; 22:44–48.
- 337 2. Boppana SB, Ross SA, Fowler KB. Congenital cytomegalovirus infection: clinical outcome. *Clin*  
338 *Infect Dis.* **2013**; 57 Suppl 4:S178-181.
- 339 3. Gantt S, Orem J, Krantz EM, et al. Prospective Characterization of the Risk Factors for  
340 Transmission and Symptoms of Primary Human Herpesvirus Infections Among Ugandan Infants. *J*  
341 *Infect Dis.* **2016**; 214(1):36–44.
- 342 4. Orange JS. Natural killer cell deficiency. *J Allergy Clin Immunol.* **2013**; 132(3):515–525.
- 343 5. Mace EM, Paust S, Conte MI, et al. Human NK cell deficiency as a result of biallelic mutations in  
344 MCM10. *J Clin Invest.* **2020**; 130(10):5272–5286.
- 345 6. Bukowski JF, Woda BA, Welsh RM. Pathogenesis of murine cytomegalovirus infection in natural  
346 killer cell-depleted mice. *J Virol.* **1984**; 52(1):119–128.
- 347 7. Arase H, Mocarski ES, Campbell AE, Hill AB, Lanier LL. Direct Recognition of Cytomegalovirus  
348 by Activating and Inhibitory NK Cell Receptors. *Science. American Association for the*  
349 *Advancement of Science*; **2002**; 296(5571):1323–1326.
- 350 8. Smith HRC, Heusel JW, Mehta IK, et al. Recognition of a virus-encoded ligand by a natural killer  
351 cell activation receptor. *PNAS. National Academy of Sciences*; **2002**; 99(13):8826–8831.
- 352 9. Kajubi R, Ochieng T, Kakuru A, et al. Monthly sulfadoxine-pyrimethamine versus  
353 dihydroartemisinin-piperaquine for intermittent preventive treatment of malaria in pregnancy: a  
354 double-blind, randomised, controlled, superiority trial. *Lancet.* **2019**; 393(10179):1428–1439.

- 355 10. Boeckh M, Huang M, Ferrenberg J, et al. Optimization of Quantitative Detection of  
356 Cytomegalovirus DNA in Plasma by Real-Time PCR. *Journal of Clinical Microbiology*. American  
357 Society for Microbiology (ASM); **2004**; 42(3):1142.
- 358 11. Lamoreaux L, Roederer M, Koup R. Intracellular cytokine optimization and standard operating  
359 procedure. *Nat Protoc*. **2006**; 1(3):1507–1516.
- 360 12. Maecker HT, Trotter J. Flow cytometry controls, instrument setup, and the determination of  
361 positivity. *Cytometry A*. **2006**; 69(9):1037–1042.
- 362 13. Milush JM, Long BR, Snyder-Cappione JE, et al. Functionally distinct subsets of human NK cells  
363 and monocyte/DC-like cells identified by coexpression of CD56, CD7, and CD4. *Blood*. **2009**;  
364 114(23):4823–4831.
- 365 14. Björkström NK, Ljunggren H-G, Sandberg JK. CD56 negative NK cells: origin, function, and role  
366 in chronic viral disease. *Trends in Immunology*. **2010**; 31(11):401–406.
- 367 15. Rabinowich H, Pricop L, Herberman RB, Whiteside TL. Expression and function of CD7 molecule  
368 on human natural killer cells. *The Journal of Immunology*. American Association of Immunologists;  
369 **1994**; 152(2):517–526.
- 370 16. Hammer Q, Rückert T, Borst EM, et al. Peptide-specific recognition of human cytomegalovirus  
371 strains controls adaptive natural killer cells. *Nat Immunol*. **2018**; 19(5):453–463.
- 372 17. Dalle J-H, Menezes J, Wagner É, et al. Characterization of Cord Blood Natural Killer Cells:  
373 Implications for Transplantation and Neonatal Infections. *Pediatr Res*. **2005**; 57(5):649–655.
- 374 18. Zhang J, Le Gras S, Pouxvielh K, et al. Sequential actions of EOMES and T-BET promote stepwise  
375 maturation of natural killer cells. *Nat Commun*. **2021**; 12(1):5446.

- 376 19. Collins A, Rothman N, Liu K, Reiner SL. Eomesodermin and T-bet mark developmentally distinct  
377 human natural killer cells. *JCI Insight*. 2(5):e90063.
- 378 20. Lanier LL. Up on the tightrope: natural killer cell activation and inhibition. *Nat Immunol*. **2008**;  
379 9(5):495–502.
- 380 21. Muntasell A, Vilches C, Angulo A, López-Botet M. Adaptive reconfiguration of the human NK-cell  
381 compartment in response to cytomegalovirus: A different perspective of the host-pathogen  
382 interaction. *European Journal of Immunology*. **2013**; 43(5):1133–1141.
- 383 22. Strauss-Albee DM, Liang EC, Ranganath T, Aziz N, Blish CA. The newborn human NK cell  
384 repertoire is phenotypically formed but functionally reduced. *Cytometry Part B: Clinical Cytometry*.  
385 **2017**; 92(1):33–41.
- 386 23. Béziat V, Descours B, Parizot C, Debré P, Vieillard V. NK Cell Terminal Differentiation:  
387 Correlated Stepwise Decrease of NKG2A and Acquisition of KIRs. *PLOS ONE. Public Library of*  
388 *Science*; **2010**; 5(8):e11966.
- 389 24. Gumá M, Angulo A, Vilches C, Gómez-Lozano N, Malats N, López-Botet M. Imprint of human  
390 cytomegalovirus infection on the NK cell receptor repertoire. *Blood*. **2004**; 104(12):3664–3671.
- 391 25. Goodier MR, White MJ, Darboe A, et al. Rapid NK cell differentiation in a population with near-  
392 universal human cytomegalovirus infection is attenuated by NKG2C deletions. *Blood*. **2014**;  
393 124(14):2213–2222.
- 394 26. Goodier MR, Riley E. Regulation of the human NK cell compartment by pathogens and vaccines.  
395 *Clinical & translational immunology. Nature Publishing Group*; **2021**; 10:e1244.
- 396 27. Ivarsson MA, Loh L, Marquardt N, et al. Differentiation and functional regulation of human fetal  
397 NK cells. *J Clin Invest*. **2013**; 123(9):3889–3901.



- 398 28. Phillips JH, Hori T, Nagler A, Bhat N, Spits H, Lanier LL. Ontogeny of human natural killer (NK)  
399 cells: fetal NK cells mediate cytolytic function and express cytoplasmic CD3 epsilon,delta proteins.  
400 *J Exp Med.* **1992**; 175(4):1055–1066.
- 401 29. Gaddy J, Risdon G, Broxmeyer HE. Cord blood natural killer cells are functionally and  
402 phenotypically immature but readily respond to interleukin-2 and interleukin-12. *J Interferon*  
403 *Cytokine Res.* **1995**; 15(6):527–536.
- 404 30. Callaway PC, Farrington LA, Feeney ME. Malaria and Early Life Immunity: Competence in  
405 Context. *Front Immunol.* **2021**; 12:634749.
- 406 31. Jennewein MF, Goldfarb I, Dolatshahi S, et al. Fc Glycan-Mediated Regulation of Placental  
407 Antibody Transfer. *Cell.* **2019**; 178(1):202-215.e14.
- 408 32. Fowler KB, Stagno S, Pass RF, Britt WJ, Boll TJ, Alford CA. The outcome of congenital  
409 cytomegalovirus infection in relation to maternal antibody status. *N Engl J Med.* **1992**;  
410 326(10):663–667.
- 411 33. Semmes EC, Miller IG, Jenks JA, et al. Maternal Fc-mediated non-neutralizing antibody responses  
412 correlate with protection against congenital human cytomegalovirus infection. *medRxiv.* **2021**;  
413 :2021.12.05.21267312.
- 414 34. Mavilio D, Lombardo G, Benjamin J, et al. Characterization of CD56-/CD16+ natural killer (NK)  
415 cells: a highly dysfunctional NK subset expanded in HIV-infected viremic individuals. *Proc Natl*  
416 *Acad Sci U S A.* **2005**; 102(8):2886–2891.
- 417 35. Milush JM, López-Vergès S, York VA, et al. CD56negCD16+NK cells are activated mature NK  
418 cells with impaired effector function during HIV-1 infection. *Retrovirology.* **2013**; 10(1):158.

- 419 36. Forconi CS, Cosgrove CP, Saikumar-Lakshmi P, et al. Poorly cytotoxic terminally differentiated  
420 CD56negCD16pos NK cells accumulate in Kenyan children with Burkitt lymphomas. *Blood Adv.*  
421 **2018**; 2(10):1101–1114.
- 422 37. Gaddy J, Broxmeyer HE. Cord blood CD16+56- cells with low lytic activity are possible precursors  
423 of mature natural killer cells. *Cell Immunol.* **1997**; 180(2):132–142.
- 424 38. Jacobson A, Bell F, Lejarcegui N, Mitchell C, Frenkel L, Horton H. Healthy Neonates Possess a  
425 CD56-Negative NK Cell Population with Reduced Anti-Viral Activity. *PLoS One.* **2013**;  
426 8(6):e67700.
- 427 39. Voigt J, Malone DFG, Dias J, et al. Proteome analysis of human CD56neg NK cells reveals a  
428 homogeneous phenotype surprisingly similar to CD56dim NK cells. *Eur J Immunol.* **2018**;  
429 48(9):1456–1469.
- 430 40. Forconi CS, Oduor CI, Oluoch PO, et al. A New Hope for CD56negCD16pos NK Cells as  
431 Unconventional Cytotoxic Mediators: An Adaptation to Chronic Diseases. *Front Cell Infect*  
432 *Microbiol.* **2020**; 10:162.
- 433 41. Hendricks DW, Balfour HH, Dunmire SK, Schmeling DO, Hogquist KA, Lanier LL. Cutting edge:  
434 NKG2C(hi)CD57+ NK cells respond specifically to acute infection with cytomegalovirus and not  
435 Epstein-Barr virus. *J Immunol.* **2014**; 192(10):4492–4496.
- 436 42. Lopez-Vergès S, Milush JM, Schwartz BS, et al. Expansion of a unique CD57<sup>+</sup>NKG2Chi natural  
437 killer cell subset during acute human cytomegalovirus infection. *Proc Natl Acad Sci U S A.* **2011**;  
438 108(36):14725–14732.
- 439 43. Braud VM, Allan DSJ, O’Callaghan CA, et al. HLA-E binds to natural killer cell receptors  
440 CD94/NKG2A, B and C. *Nature.* **1998**; 391(6669):795–799.

- 441 44. Tomasec P, Braud VM, Rickards C, et al. Surface expression of HLA-E, an inhibitor of natural  
442 killer cells, enhanced by human cytomegalovirus gpUL40. *Science*. **2000**; 287(5455):1031.
- 443 45. Rölle A, Pollmann J, Ewen E-M, et al. IL-12-producing monocytes and HLA-E control HCMV-  
444 driven NKG2C+ NK cell expansion. *J Clin Invest*. **2014**; 124(12):5305–5316.
- 445 46. Goriely S, Van Lint C, Dadkhah R, et al. A Defect in Nucleosome Remodeling Prevents IL-12(p35)  
446 Gene Transcription in Neonatal Dendritic Cells. *Journal of Experimental Medicine*. **2004**;  
447 199(7):1011–1016.
- 448 47. Lau AS, Sigaroudinia M, Yeung MC, Kohl S. Interleukin-12 Induces Interferon- $\gamma$  Expression and  
449 Natural Killer Cytotoxicity in Cord Blood Mononuclear Cells. *Pediatr Res*. **1996**; 39(1):150–155.
- 450 48. Noyola DE, Fortuny C, Muntasell A, et al. Influence of congenital human cytomegalovirus infection  
451 and the NKG2C genotype on NK-cell subset distribution in children. *European Journal of*  
452 *Immunology*. **2012**; 42(12):3256–3266.

453

454

455

456

457

458

459

460

461

462

463

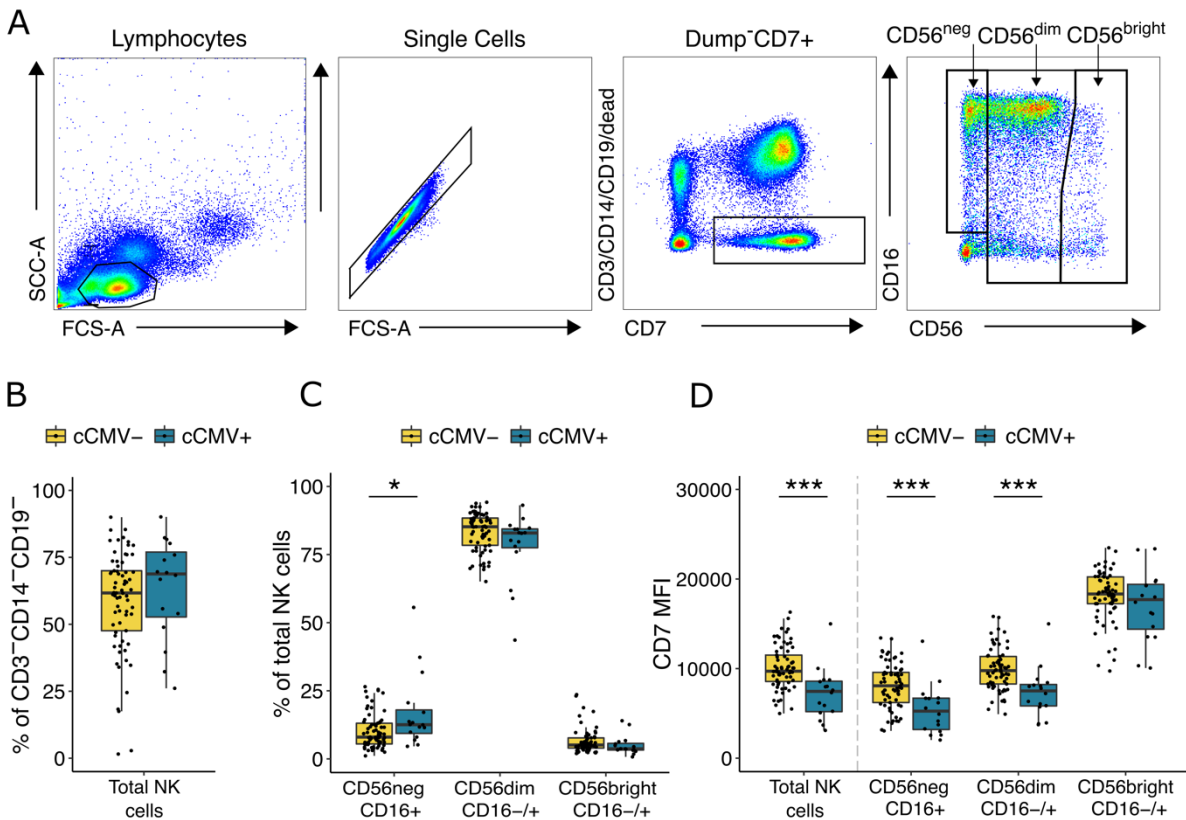

464

465 **Figure 1. CD56<sup>neg</sup> NK cells expand in newborns with congenital CMV infection.** A) Gating strategy

466 for total NK cells and NK cell subsets. NK cells are defined as lymphocytes > single cells >

467 CD3<sup>-</sup>/CD14<sup>-</sup>/CD19<sup>-</sup>/CD7<sup>+</sup> > CD56<sup>+</sup> and/or CD16<sup>+</sup>. NK subsets are defined based on their relative

468 expression of CD56 and CD16. Total NK cells is the sum of the three gated subsets. B) Frequency of total

469 NK cells in CMV infected (cCMV+, n = 16, blue) and uninfected (cCMV-, n = 69, yellow) newborns. C)

470 Frequency of NK cell subsets out of total NK cells in cord blood derived from cCMV+ (n = 16, blue) and

471 cCMV- (n = 69, yellow) newborns. D) Density of CD7 expression on NK cells measured as normalized

472 MFI (median) between cCMV+ (n = 16, blue) and cCMV- (n = 69, yellow) infants. \**P* < 0.05, \*\*\**P* <

473 0.001, Wilcoxon rank sum test.

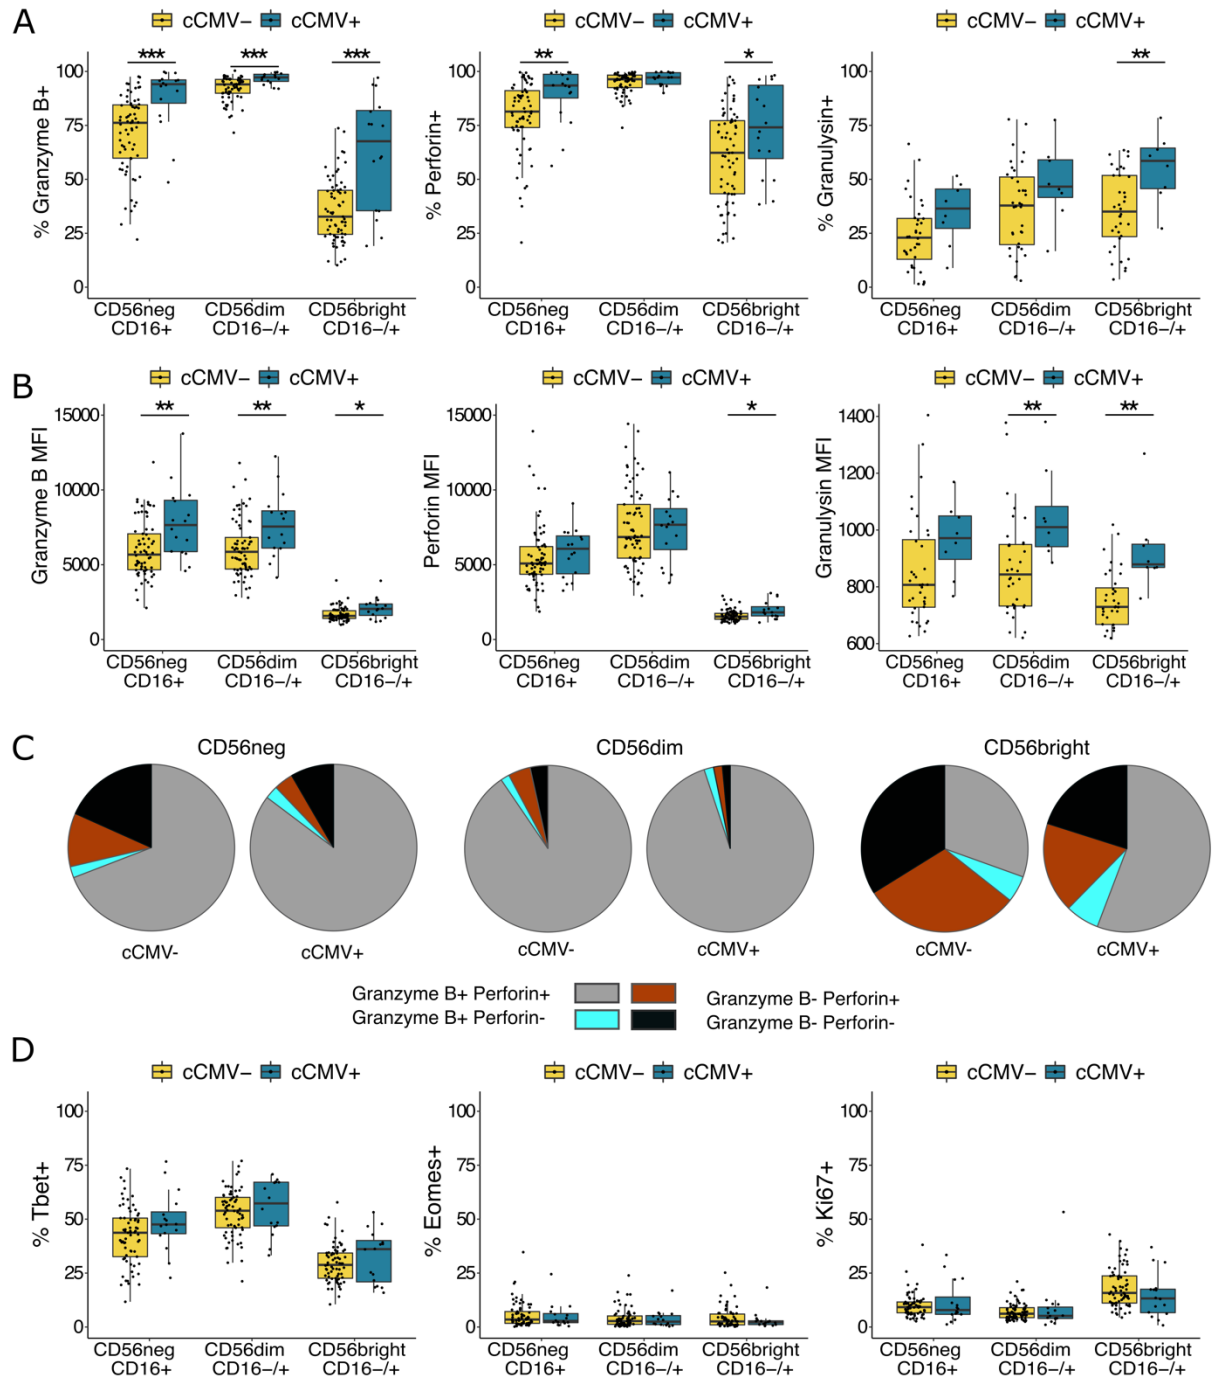

474

475

476

477 **Figure 2. NK cells from cCMV+ neonates express higher levels of cytotoxic mediators.** A) Frequency  
478 of cord blood NK cells expressing granzyme B, perforin and granulysin from cCMV+ newborns (n = 16,  
479 blue) and cCMV- controls (n = 69, yellow). Granulysin expression was evaluated on a smaller subset of  
480 cord blood samples (cCMV+, n = 8; cCMV-, n = 36). NK cells are defined as lymphocytes > single cells  
481 > CD3-/CD14-/CD19-> CD56+ and/or CD16+. Note that CD7 was not included in the flow cytometry  
482 panel used to evaluate markers listed in Figure 2. See details in Supplementary Figure 1B. B) Density of  
483 granzyme B, perforin and granulysin expression on NK cell subsets measured as normalized MFI from  
484 cCMV+ newborns (n = 16, blue) and cCMV- controls (n = 69, yellow). C) Proportion of NK cell subsets  
485 expressing the listed combination of granzyme B and perforin in cCMV- (n = 69) and cCMV+ infants (n  
486 = 16). Co-expression is calculated using Boolean gating in FlowJo and pie graphs, depicting average  
487 proportions, are generated in SPICE. D) Frequency of NK cells expressing T-bet, eomesodermin and  
488 Ki67 in cCMV+ infants (n = 16, blue) and cCMV- controls (n = 69, yellow). \* $P < 0.05$ , \*\* $P < 0.01$ ,  
489 \*\*\* $P < 0.001$ , Wilcoxon rank sum test.

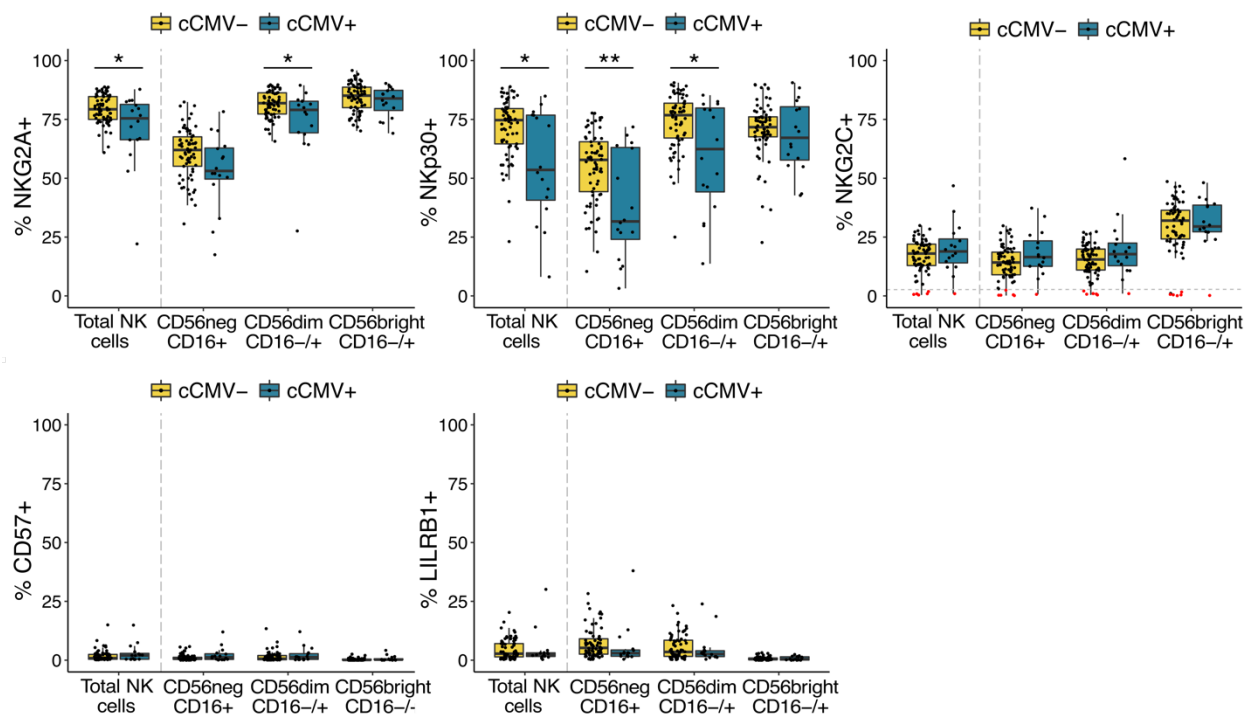

491

492 **Figure 3. NK cells show altered expression of NKR in cCMV+ newborns.** Frequency of NK cells  
 493 expressing NKG2A, NKp30, NKG2C, CD57 and LILRB1 in cord blood derived from cCMV+ (n = 16,  
 494 blue) and cCMV- (n = 69, yellow) newborns. NK cells are defined as lymphocytes > single cells >  
 495 CD3<sup>-</sup>/CD14<sup>-</sup>/CD19<sup>-</sup>/CD7<sup>+</sup> CD56<sup>+</sup> and/or CD16<sup>+</sup>. For NK cell gating strategy refer to Fig. 1A.  
 496 Individuals with < 2% of their total NK cells expressing NKG2C<sup>+</sup> are highlighted in red/below dotted  
 497 line in the NKG2C panel. \**P* < 0.05, \*\**P* < 0.01, Wilcoxon rank sum test.  
 498

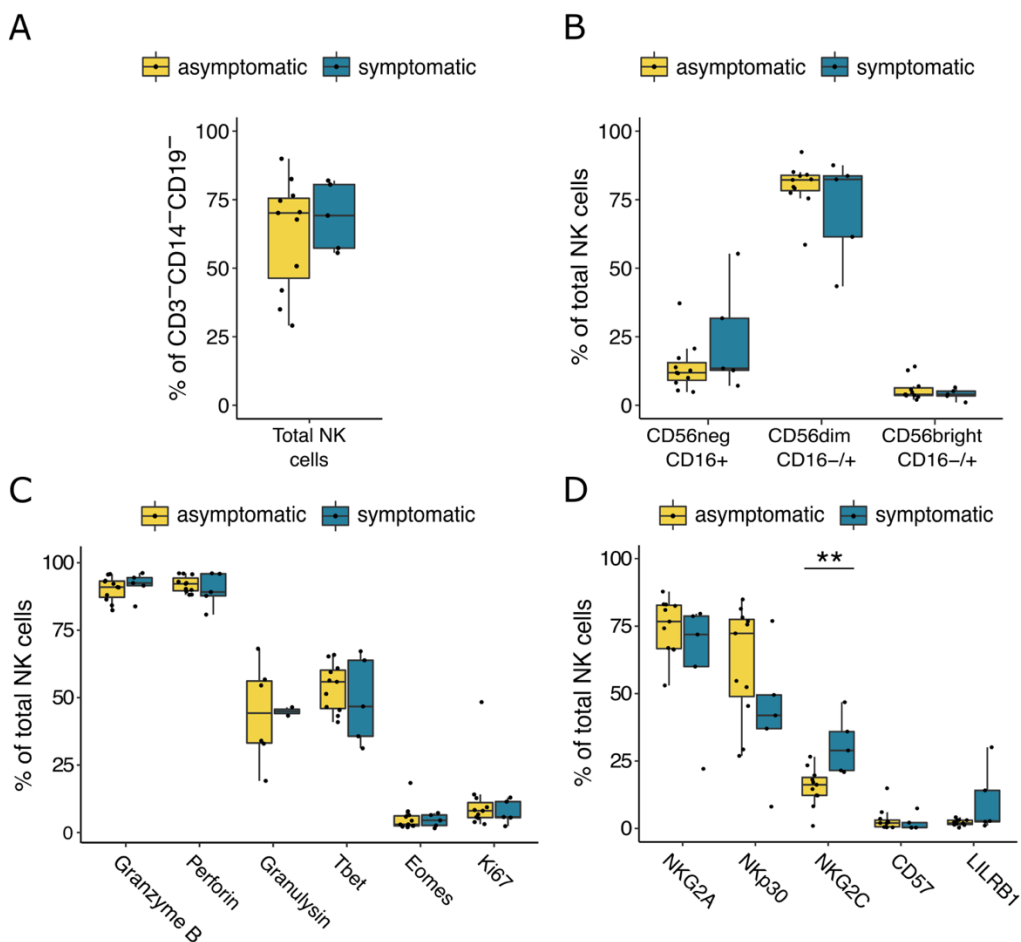

499

500 **Figure 4. NK cell phenotype in symptomatic and asymptomatic cCMV cases.** A) Frequency of total  
 501 NK cells defined as CD3<sup>-</sup>/CD14<sup>-</sup>/CD19<sup>-</sup>/CD7<sup>+</sup> lymphocytes in cord blood from symptomatic (n = 5,  
 502 blue) and asymptomatic (n = 11, yellow) cCMV+ newborns. Newborns are defined as symptomatic if

503 they demonstrated severe microcephaly and/or were small-for-gestational age (SGA) at birth. B)  
504 Frequency of NK cell subsets out of total NK cells in cord blood derived from symptomatic (n = 5, blue)  
505 and asymptomatic (n = 11, yellow) cCMV+ newborns. C) Frequency of NK cells expressing granzyme B,  
506 perforin, granulysin, Tbet, eomesodermin and Ki67 in symptomatic (n = 5, blue) and asymptomatic (n =  
507 11, yellow) cCMV+ newborns. C) Frequency of NK cells expressing NKG2A, NKp30, NKG2C, CD57  
508 and LILRB1 in symptomatic (n = 5, blue) and asymptomatic (n = 11, yellow) cCMV+ newborns.  $**P <$   
509  $0.01$ . For gating strategy of NK cell subsets refer to Fig. 1A for panels A, B and D, and supplementary  
510 Fig. 1B for panel C.

511

512

513

514

515

516

517

518

519

520

521

522

523

524

525

526

527

528



529 **Supplementary Table 1.** Antibodies for flow cytometry

| Antibodies (Target   Color   Clone   Manufacturer) |                                      |
|----------------------------------------------------|--------------------------------------|
| Extracellular targets                              | Intracellular targets                |
| NKG2C-BV421 (134591, BD)                           | Granzyme B-AF700 (GB11, BD)          |
| CD3-BV510 (UCTH1, Biolegend)                       | Perforin-BV421 ( $\delta$ G9, BD)    |
| CD14-BV510/APC-Cy7 (M5E2, Biolegend)               | Eomes-PE-e610 (WD1928, Thermofisher) |
| CD19-BV510/APC-Cy7 (HIB19, Biolegend)              | Tbet-BV711 (4B10, Biolegend)         |
| CD56-BV605 (HCD56, Biolegend)                      | Ki67-PE (B56, BD)                    |
| NKp30-BV711 (P30-15, BD)                           | Granulysin-PE (DH2, Biolegend)       |
| CD16-BV780/BV785 (3G8, Biolegend)                  |                                      |
| NKG2A-FITC (REA110, Miltenyi)                      |                                      |
| CD7-APC-eFluor 780 (124-1D1, Thermo/eBioscience)   |                                      |
| LILRB1-PE-Dazzle (GHI/75, Biolegend)               |                                      |
| CD57-PeCy7 (HNK1, Biolegend)                       |                                      |

530

531

532

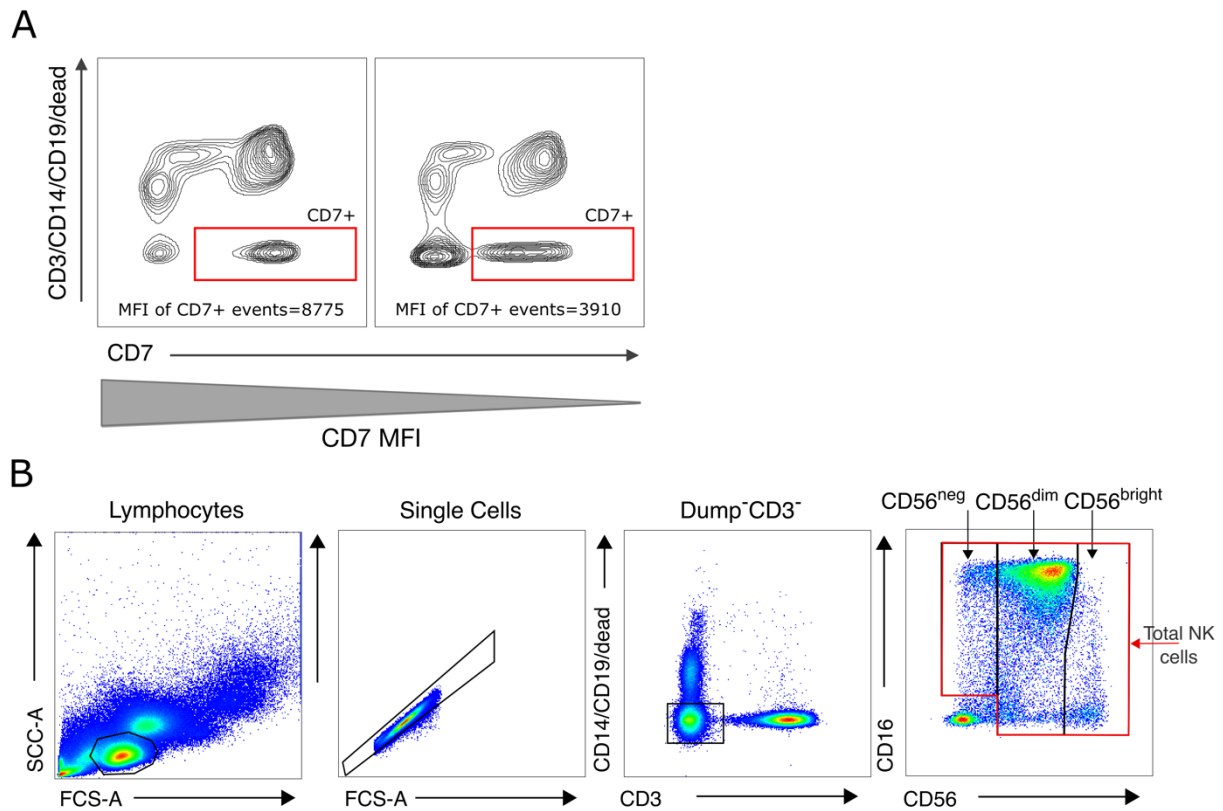

533

534 **Supplementary Figure 1. CD7 gating example and gating strategy for NK response markers A)**

535 Representative flow contour plots showing gating of CD7<sup>+</sup> events in two representative cord blood

536 samples. Even in samples displaying substantial downregulation of CD7 measured as the median

537 fluorescent intensity (MFI) (*right*), the CD7<sup>+</sup> population is still easily distinguished. B) Gating strategy

538 for response markers on NK cell subsets presented in Figure 2. NK cells are defined as lymphocytes >

539 single cells > live/CD3<sup>-</sup>/CD14<sup>-</sup>/CD19<sup>-</sup> > CD56<sup>+</sup> and/or CD16<sup>+</sup> without the use of CD7. NK subsets are

540 further defined based on relative expression of CD56 and CD16.

541

542
